# Supplementary material for: Azobenzene as Antimicrobial Molecules
Source: MDPI journal article supplement (doi:10.3390/molecules27175643), 2022-09-01
Supplement: s1 [file s1]

# Supplementary Information

## Azobenzenes as antimicrobial molecules

Miriam Di Martino <sup>1</sup>, Lucia Sessa <sup>1</sup>, Martina Di Matteo <sup>1</sup>, Barbara Panunzi <sup>2</sup>, Stefano Piotto <sup>1,3</sup> and Simona Concilio <sup>1,3,\*</sup>

<sup>1</sup> Department of Pharmacy, University of Salerno, Via Giovanni Paolo II, 132, 84084 Fisciano, Italy

<sup>2</sup> Department of Agriculture, University of Napoli Federico II, 80126 Naples, Italy

<sup>3</sup> Bionam Research Center for Biomaterials, University of Salerno, Fisciano, Italy

\* Correspondence: sconcilio@unisa.it

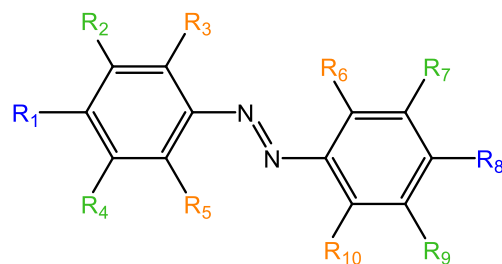

**Table S1 – Antimicrobial activities of azobenzene based compounds**

| R1                                     | R2 | R3 | R4 | R5 | R6 | R7     | R8      | R9 | R10 | Gram– |     | Gram+ |    | Ref.                                                                                                         |
|----------------------------------------|----|----|----|----|----|--------|---------|----|-----|-------|-----|-------|----|--------------------------------------------------------------------------------------------------------------|
| Minimum inhibitory concentration (MIC) |    |    |    |    |    |        |         |    |     |       |     |       |    |                                                                                                              |
| hydroxy                                |    |    |    |    |    | ethyl  | hydroxy |    |     | >60   | >60 | 30    | 50 | [1]<br>The Gram+ tested were <i>S. aureus</i> A170 (on the left) and <i>L. monocytogenes</i> (on the right). |
| hydroxy                                |    |    |    |    |    | allyl  | hydroxy |    |     | >60   | >60 | 20    | 25 |                                                                                                              |
| hydroxy                                |    |    |    |    |    | propyl | hydroxy |    |     | >60   | >60 | 20    | 25 |                                                                                                              |

|                 |         |  |  |  |         |        |         |        |  |      |      |      |      |                                                                                                                                                                                                                                                                                                                |
|-----------------|---------|--|--|--|---------|--------|---------|--------|--|------|------|------|------|----------------------------------------------------------------------------------------------------------------------------------------------------------------------------------------------------------------------------------------------------------------------------------------------------------------|
| hydroxy         |         |  |  |  |         | methyl | hydroxy | methyl |  | >60  | >60  | 20   | 25   | The Gram-tested were <i>Salmonella typhimurium</i> (on the left) and <i>Pseudomonas aeruginosa</i> ATCC-27853 (on the right). The values are expressed as MIC <sub>0</sub> (µg/mL)                                                                                                                             |
| hydroxy         |         |  |  |  |         | methyl | hydroxy | allyl  |  | >60  | >60  | 25   | > 60 |                                                                                                                                                                                                                                                                                                                |
| butoxy          |         |  |  |  |         | methyl | hydroxy | methyl |  | >128 | >128 | 32   | >128 | [2]<br>The Gram+ tested were <i>Staphylococcus aureus</i> ATCC 29213 (on the left) and <i>L. monocytogenes</i> (on the right). The Gram-tested were <i>Pseudomonas aeruginosa</i> PAO1 (on the left) and <i>Escherichia coli</i> MG1655 (on the right). The values are expressed as MIC <sub>100</sub> (µg/mL) |
| isobutoxy       |         |  |  |  |         | methyl | hydroxy | methyl |  | >128 | >128 | 128  | 128  |                                                                                                                                                                                                                                                                                                                |
| neopentyloxy    |         |  |  |  |         | methyl | hydroxy | methyl |  | >128 | >128 | >128 | >128 |                                                                                                                                                                                                                                                                                                                |
| Isopentyloxy    |         |  |  |  |         | methyl | hydroxy | methyl |  | >128 | >128 | 4    | 8    |                                                                                                                                                                                                                                                                                                                |
| 2-Ethylhexyloxy |         |  |  |  |         | methyl | hydroxy | methyl |  | >128 | >128 | 12   | 48   |                                                                                                                                                                                                                                                                                                                |
|                 |         |  |  |  |         | methyl | hydroxy | methyl |  | >128 | >128 | >128 | >128 |                                                                                                                                                                                                                                                                                                                |
| isobutoxy       |         |  |  |  | hydroxy |        | hydroxy |        |  | >128 | >128 | >128 | 96   |                                                                                                                                                                                                                                                                                                                |
| neopentyloxy    |         |  |  |  | hydroxy |        | hydroxy |        |  | >128 | >128 | 4    | 8    |                                                                                                                                                                                                                                                                                                                |
| isopentyloxy    |         |  |  |  | hydroxy |        | hydroxy |        |  | >128 | >128 | 4    | 8    |                                                                                                                                                                                                                                                                                                                |
| 2-Ethylhexyloxy |         |  |  |  | hydroxy |        | hydroxy |        |  | >128 | >128 | 16   | 16   |                                                                                                                                                                                                                                                                                                                |
| hydroxy         |         |  |  |  | hydroxy |        | hydroxy |        |  | >128 | >128 | >128 | >128 |                                                                                                                                                                                                                                                                                                                |
| methyl          |         |  |  |  | hydroxy |        | hydroxy |        |  | >128 | >128 | >32  | >32  |                                                                                                                                                                                                                                                                                                                |
| methoxy         |         |  |  |  | hydroxy |        | hydroxy |        |  | >128 | >128 | 16   | 16   |                                                                                                                                                                                                                                                                                                                |
|                 | hydroxy |  |  |  |         | methyl | hydroxy | methyl |  | >35  |      | 30   |      | [3]<br>The Gram+ tested was                                                                                                                                                                                                                                                                                    |
|                 |         |  |  |  |         | methyl | hydroxy | methyl |  | >35  |      | 7    |      |                                                                                                                                                                                                                                                                                                                |

|         |        |  |  |  |           |        |                             |        |  |         |           |                                                                                                                                      |         |                                                                                                                                                                                                                                                                                 |
|---------|--------|--|--|--|-----------|--------|-----------------------------|--------|--|---------|-----------|--------------------------------------------------------------------------------------------------------------------------------------|---------|---------------------------------------------------------------------------------------------------------------------------------------------------------------------------------------------------------------------------------------------------------------------------------|
| methoxy |        |  |  |  |           | methyl | hydroxy                     | methyl |  | >35     | >35       | Staphylococcus aureus A170. The Gram-test was <i>P. aeruginosa</i> ATCC-27853. The values are expressed as MIC <sub>50</sub> (µg/mL) |         |                                                                                                                                                                                                                                                                                 |
| methyl  |        |  |  |  |           | methyl | hydroxy                     | methyl |  | >35     | >35       |                                                                                                                                      |         |                                                                                                                                                                                                                                                                                 |
| hydroxy |        |  |  |  |           |        |                             |        |  | >35     | 25        |                                                                                                                                      |         |                                                                                                                                                                                                                                                                                 |
| hydroxy |        |  |  |  |           |        | Methoxy                     |        |  | >35     | 25        |                                                                                                                                      |         |                                                                                                                                                                                                                                                                                 |
| hydroxy |        |  |  |  |           |        | methyl                      |        |  | >35     | 7         |                                                                                                                                      |         |                                                                                                                                                                                                                                                                                 |
| hexyl   |        |  |  |  |           |        | N,N,N-trimethylethanaminium |        |  | 64      | >64       | 16                                                                                                                                   | 4       | [4] MIC values (µg/mL) against the studied Gram-positive and Gram-negative strains. Gram-: <i>E. coli</i> ATCC 25922 on the left and <i>P. aeruginosa</i> ATCC 47085 on the right. Gram+: <i>S. aureus</i> ATCC 29213 on the left and <i>S. aureus</i> ATCC 43300 on the right. |
| heptyl  |        |  |  |  |           |        | N,N,N-trimethylethanaminium |        |  | 8 trans | >64 trans | 1 trans                                                                                                                              | 1 trans |                                                                                                                                                                                                                                                                                 |
| heptyl  |        |  |  |  |           |        | N,N,N-trimethylethanaminium |        |  | 16 cis  | - cis     | 4 cis                                                                                                                                | 2 cis   |                                                                                                                                                                                                                                                                                 |
| decyl   |        |  |  |  |           |        | N,N,N-trimethylethanaminium |        |  | >64     | >64       | 8                                                                                                                                    | 8       |                                                                                                                                                                                                                                                                                 |
| hexyl   |        |  |  |  |           |        | tobramycin                  |        |  | 64      | 32        | 64                                                                                                                                   | 64      |                                                                                                                                                                                                                                                                                 |
| heptyl  |        |  |  |  |           |        | tobramycin                  |        |  | 64      | 16        | 16                                                                                                                                   | 8       |                                                                                                                                                                                                                                                                                 |
| heptyl  |        |  |  |  |           |        | tobramycin                  |        |  | 32      | 4         | 4                                                                                                                                    | 8       |                                                                                                                                                                                                                                                                                 |
| decyl   |        |  |  |  |           |        | tobramycin                  |        |  | >64     | >64       | 64                                                                                                                                   | >64     |                                                                                                                                                                                                                                                                                 |
| methoxy |        |  |  |  | quinolone |        |                             |        |  | 8       | 16        | NA                                                                                                                                   | NA      | [5] Antibacterial activity was determined before (on                                                                                                                                                                                                                            |
|         | methyl |  |  |  | quinolone |        |                             |        |  | >64     | 16        | 16                                                                                                                                   | 2       |                                                                                                                                                                                                                                                                                 |

|          |          |          |          |         |           |  |         |                           |  |      |      |      |      |                                                                                                                                                                                                                                                                                        |
|----------|----------|----------|----------|---------|-----------|--|---------|---------------------------|--|------|------|------|------|----------------------------------------------------------------------------------------------------------------------------------------------------------------------------------------------------------------------------------------------------------------------------------------|
|          | methyl   |          | methyl   |         | quinolone |  |         |                           |  | >64  | >64  | NA   | NA   | the left) and after irradiation (on the right) at 365 nm on <i>Escherichia coli</i> CS1562. The compounds 2 was tested against the Gram+ <i>M. luteus</i> .                                                                                                                            |
| methoxy  | methyl   | methyl   |          | methyl  | quinolone |  |         |                           |  | >64  | 32   | NA   | NA   |                                                                                                                                                                                                                                                                                        |
|          | methyl   |          |          | methoxy | quinolone |  |         |                           |  | 16   | 16   | NA   | NA   |                                                                                                                                                                                                                                                                                        |
| methoxy  | fluoride |          |          |         | quinolone |  |         |                           |  | >64  | 64   | NA   | NA   |                                                                                                                                                                                                                                                                                        |
| methoxy  | fluoride |          | fluoride |         | quinolone |  |         |                           |  | >64  | 32   | NA   | NA   |                                                                                                                                                                                                                                                                                        |
|          | fluoride |          |          | methoxy | quinolone |  |         |                           |  | 16   | 16   | NA   | NA   |                                                                                                                                                                                                                                                                                        |
| methoxy  | methoxy  |          |          |         | quinolone |  |         |                           |  | 64   | 64   | NA   | NA   |                                                                                                                                                                                                                                                                                        |
|          | bromide  |          |          |         |           |  | hydroxy | 4-chloroaniline           |  | 3.02 | 1.51 | 3.02 | 3.02 | [6] Antimicrobial activity of diazenyl schiff bases expressed as MIC values (µg/mL). Gram-: <i>E. coli</i> MTCC 1652 (on the left) and <i>P. aeruginosa</i> MTCC 1688 (on the right). Gram+: <i>S. aureus</i> MTCC 2901 (on the left) and <i>B. subtilis</i> MTCC 2063 (on the right). |
| nitro    |          | chloride |          |         |           |  | hydroxy | 2-fluoroaniline           |  | 3.14 | 1.57 | 6.28 | 3.14 |                                                                                                                                                                                                                                                                                        |
|          | bromide  |          |          |         |           |  | hydroxy | 4-fluoro-2-methoxyaniline |  | 1.37 | 1.37 | 1.37 | 2.75 |                                                                                                                                                                                                                                                                                        |
|          |          | bromide  |          |         |           |  | hydroxy | 4-nitroaniline            |  | 1.47 | 1.47 | 1.47 | 2.94 |                                                                                                                                                                                                                                                                                        |
| chloride | nitro    |          |          |         |           |  | hydroxy | 2-methylaniline           |  | 3.17 | 1.59 | 3.17 | 3.17 |                                                                                                                                                                                                                                                                                        |
| chloride |          |          |          |         |           |  | hydroxy | 2,4-dimethylaniline       |  | 1.72 | 1.72 | 1.72 | 3.44 |                                                                                                                                                                                                                                                                                        |
|          | chloride |          |          |         |           |  | hydroxy | 2-methyl-4-chloroaniline  |  | 0.86 | 1.72 | 1.72 | 1.72 |                                                                                                                                                                                                                                                                                        |
|          |          |          | chloride |         |           |  | hydroxy | 4-(methylthio)aniline     |  | 1.5  | 1.5  | 1.5  | 3    |                                                                                                                                                                                                                                                                                        |
|          |          | chloride | chloride |         |           |  | hydroxy | 2,4-dimethylaniline       |  | 1.57 | 1.57 | 0.78 | 3.14 |                                                                                                                                                                                                                                                                                        |

|        |          |          |          |  |  |  |         |                         |  |      |      |      |      |  |
|--------|----------|----------|----------|--|--|--|---------|-------------------------|--|------|------|------|------|--|
|        | chloride |          |          |  |  |  | hydroxy | 2,4-dimethylaniline     |  | 1.72 | 3.44 | 3.44 | 3.44 |  |
| methyl |          | methyl   |          |  |  |  | hydroxy | 2,5-dichloroaniline     |  | 1.57 | 1.57 | 0.78 | 3.14 |  |
| methyl |          | methyl   |          |  |  |  | hydroxy | 4-fluoroaniline         |  | 0.9  | 0.9  | 0.9  | 3.6  |  |
|        |          | fluoride |          |  |  |  | hydroxy | 2,6-dimethylaniline     |  | 3.6  | 3.6  | 3.6  | 3.6  |  |
|        | bromide  |          |          |  |  |  | hydroxy | 2,5-dichloroaniline     |  | 1.39 | 1.39 | 1.39 | 2.78 |  |
|        | bromide  |          |          |  |  |  | hydroxy | 2-chloro-4-nitroaniline |  | 1.36 | 1.36 | 1.36 | 2.72 |  |
| nitro  |          | chloride |          |  |  |  | hydroxy | 3-methoxyaniline        |  | 3.05 | 1.52 | 1.52 | 3.05 |  |
| nitro  |          | chloride |          |  |  |  | hydroxy | 4-fluoroaniline         |  | 3.14 | 3.14 | 3.14 | 3.14 |  |
| nitro  |          | chloride |          |  |  |  | hydroxy | 2,6-dimethylaniline     |  | 3.06 | 3.06 | 3.06 | 3.06 |  |
|        |          | fluoride |          |  |  |  | hydroxy | 2,5-dichloroaniline     |  | 3.22 | 3.22 | 3.22 | 3.22 |  |
|        |          | fluoride |          |  |  |  | hydroxy | 2,4-dimethylaniline     |  | 1.8  | 1.8  | 0.9  | 3.6  |  |
|        |          | chloride | chloride |  |  |  | hydroxy | 2-methoxyaniline        |  | 0.78 | 0.78 | 0.78 | 3.13 |  |
|        |          | chloride | chloride |  |  |  | hydroxy | 3-bromoaniline          |  | 0.69 | 1.39 | 0.69 | 2.78 |  |
|        |          | chloride | chloride |  |  |  | hydroxy | 4-fluoroaniline         |  | 1.61 | 1.61 | 1.61 | 3.22 |  |
| methyl |          | methyl   |          |  |  |  | hydroxy | 3-bromoaniline          |  | 0.76 | 1.53 | 0.76 | 3.06 |  |

|                                              |       |  |  |  |  |  |                   |                              |  |      |      |      |      |                                                                                                                                                                                                                                                                                |
|----------------------------------------------|-------|--|--|--|--|--|-------------------|------------------------------|--|------|------|------|------|--------------------------------------------------------------------------------------------------------------------------------------------------------------------------------------------------------------------------------------------------------------------------------|
| bromide                                      |       |  |  |  |  |  | hydroxy           | 2-methylaniline              |  | 1.53 | 1.53 | 1.53 | 3.06 |                                                                                                                                                                                                                                                                                |
| methyl                                       |       |  |  |  |  |  | hydroxy           | N-p-tolylmethanimine         |  | 500  |      | 250  |      | [7]<br>The MIC (mg/mL) of each azo Schiff base was expressed as mg/mL and was calculated for <i>P. aeruginosa</i> and <i>S. aureus</i> .                                                                                                                                       |
| methyl                                       |       |  |  |  |  |  | hydroxy           | N-(4-nitrophenyl)methanimine |  | 50   |      | 50   |      |                                                                                                                                                                                                                                                                                |
| nitro                                        |       |  |  |  |  |  | hydroxy           | 2,3-dihydro-1H-perimidine    |  | 6.25 | 1.56 | 3.13 |      | [8]<br>The in vitro antibacterial activities of the synthesized azo fused pyrimidines were performed against <i>P. aeruginosa</i> (PA01) (on the left), <i>E. coli</i> (ATCC 25922) (on the right) and <i>B. cereus</i> (ATCC 11778). The values are expressed as MIC (µg/mL). |
|                                              | nitro |  |  |  |  |  | hydroxy           | 2,3-dihydro-1H-perimidine    |  | 12.5 | 3.13 | 6.25 |      |                                                                                                                                                                                                                                                                                |
| N-(4,6-dimethylpyrimidin-2-yl)sulfonic amide |       |  |  |  |  |  | N,N-dimethylamine |                              |  | 50   | 12.5 | 3.12 |      | [9]<br>The organisms used for the antimicrobia                                                                                                                                                                                                                                 |

|                                              |  |  |          |         |         |         |                  |  |  |       |    |       |                                                                                                                                                                   |
|----------------------------------------------|--|--|----------|---------|---------|---------|------------------|--|--|-------|----|-------|-------------------------------------------------------------------------------------------------------------------------------------------------------------------|
| N-(4,6-dimethylpyrimidin-2-yl)sulfonic amide |  |  |          |         |         |         | N,N-diethylamine |  |  | 50    | 25 | 0.8   | 1 investigation are <i>E. coli</i> (on the left), <i>P. aeruginosa</i> (on the right) and <i>E. faecalis</i> . The values are expressed as MIC (mg/mL).           |
| N-(4,6-dimethylpyrimidin-2-yl)sulfonic amide |  |  |          |         |         |         | aniline          |  |  | 25    | 25 | 0.4   |                                                                                                                                                                   |
| hydroxy                                      |  |  |          |         | bromide |         |                  |  |  | 111.7 |    | 159.5 | [10] The antibacterial activity of the compounds was screened against <i>E. coli</i> ATCC 25922 and <i>S. aureus</i> S48/81. Here we report the MIC values (ppm). |
| hydroxy                                      |  |  |          |         |         | bromide |                  |  |  | 118.3 |    | 140.9 |                                                                                                                                                                   |
| hydroxy                                      |  |  |          |         | iodide  |         |                  |  |  | 130.5 |    | 164.2 |                                                                                                                                                                   |
| hydroxy                                      |  |  |          |         |         | iodide  |                  |  |  | 145.1 |    | 155.3 |                                                                                                                                                                   |
| aspirine                                     |  |  |          |         | bromide |         |                  |  |  | >220  |    | >220  |                                                                                                                                                                   |
| aspirine                                     |  |  |          |         |         | bromide |                  |  |  | >220  |    | >220  |                                                                                                                                                                   |
| aspirine                                     |  |  |          |         | iodide  |         |                  |  |  | >220  |    | >220  |                                                                                                                                                                   |
| aspirine                                     |  |  |          |         |         | iodide  |                  |  |  | >220  |    | >220  |                                                                                                                                                                   |
| hydroxy                                      |  |  | carboxyl |         | bromide |         |                  |  |  | 89    |    | 89    |                                                                                                                                                                   |
| hydroxy                                      |  |  | carboxyl |         |         | bromide |                  |  |  | 7594  |    | 80    |                                                                                                                                                                   |
| hydroxy                                      |  |  | carboxyl |         | iodide  |         |                  |  |  | 75    |    | 64    |                                                                                                                                                                   |
| hydroxy                                      |  |  | carboxyl |         |         | iodide  |                  |  |  | 85    |    | 84    |                                                                                                                                                                   |
| Inhibition zones (mm)                        |  |  |          |         |         |         |                  |  |  |       |    |       |                                                                                                                                                                   |
| hydroxy                                      |  |  |          | hydroxy | nitro   |         |                  |  |  | NA    |    | 27    | [11] Activity toward Gram+ was tested on <i>S. aureus</i> strain NCTC 6571 using 0.4 mg/mL                                                                        |
| hydroxy                                      |  |  |          | hydroxy |         | nitro   |                  |  |  |       |    | 39    |                                                                                                                                                                   |
| hydroxy                                      |  |  |          | hydroxy |         |         | nitro            |  |  |       |    | 35    |                                                                                                                                                                   |

|                                  |  |  |          |          |  |                            |                                         |         |  |          |          |          |                                                                                                                                                                                               |
|----------------------------------|--|--|----------|----------|--|----------------------------|-----------------------------------------|---------|--|----------|----------|----------|-----------------------------------------------------------------------------------------------------------------------------------------------------------------------------------------------|
|                                  |  |  |          |          |  |                            |                                         |         |  |          |          |          | concentration                                                                                                                                                                                 |
| hydroxy                          |  |  |          |          |  |                            | decyloxy                                |         |  | 10       | 10       | Inactive | [12]<br>The Gram-tested were <i>E. coli</i> (on the left) and <i>Salmonella Typhimurium</i> (on the right). Activity toward Gram+ was tested on <i>S. aureus</i> using 1 mg/mL concentration. |
| hydroxy                          |  |  | fluoride |          |  |                            | decyloxy                                |         |  | Inactive | Inactive | Inactive |                                                                                                                                                                                               |
| hydroxy                          |  |  |          | fluoride |  |                            | decyloxy                                |         |  | Inactive | Inactive | 11       |                                                                                                                                                                                               |
| 4-bromohexyloxy                  |  |  |          |          |  |                            | decyloxy                                |         |  | 13       | 12       | 14       |                                                                                                                                                                                               |
| 4-bromohexyloxy                  |  |  | fluoride |          |  |                            | decyloxy                                |         |  | 14       | 12       | 11       |                                                                                                                                                                                               |
| decyloxy                         |  |  |          |          |  |                            | N-(hexyl-6-oxy)-N'-decyl imidazole      |         |  | 10       | 10       | Inactive |                                                                                                                                                                                               |
| decyloxy                         |  |  |          |          |  |                            | N-(hexyl-6-oxy)-N'-dodecyl imidazole    |         |  | 11       | 10       | Inactive |                                                                                                                                                                                               |
| decyloxy                         |  |  |          |          |  |                            | N-(hexyl-6-oxy)-N'-tetradecyl imidazole |         |  | 10       | 10       | Inactive |                                                                                                                                                                                               |
| decyloxy                         |  |  |          |          |  |                            | N-(hexyl-6-oxy)-N'-hexadecyl imidazole  |         |  | Inactive | Inactive | 10       | [13]<br>The antimicrobial activity of compounds was tested against <i>E. coli</i> (ATTC 25922) and <i>S. aureus</i>                                                                           |
| decyloxy                         |  |  |          |          |  |                            | N-(hexyl-6-oxy)-N'-octadecyl imidazole  |         |  | Inactive | 64       | 11       |                                                                                                                                                                                               |
| N-(pyrimidin-2-yl)sulfonic amide |  |  |          |          |  | formyl                     | hydroxy                                 | methoxy |  | 45       |          | 49       |                                                                                                                                                                                               |
| N-(pyrimidin-2-yl)sulfonic amide |  |  |          |          |  | (4-Bromophenyl)iminomethyl | hydroxy                                 | methoxy |  | 25       |          | 22       |                                                                                                                                                                                               |



|                                  |  |         |           |  |          |                                                         |          |         |  |                |    |    |                                                                                                                         |                                                                                                                                                                                                                               |
|----------------------------------|--|---------|-----------|--|----------|---------------------------------------------------------|----------|---------|--|----------------|----|----|-------------------------------------------------------------------------------------------------------------------------|-------------------------------------------------------------------------------------------------------------------------------------------------------------------------------------------------------------------------------|
| N-(pyrimidin-2-yl)sulfonic amide |  |         |           |  |          | (2-Chlorophenyl)iminomethyl                             | hydroxy  | methoxy |  | 21             |    | 25 | (ATCC 25923). Here we report the inhibition zone (mm) of all compounds against bacteria at a concentration of 30 mg/ml. |                                                                                                                                                                                                                               |
| N-(pyrimidin-2-yl)sulfonic amide |  |         |           |  |          | 3-Chloro-2-methylphenyl)iminomethyl                     | hydroxy  | methoxy |  | 22             |    | 30 |                                                                                                                         |                                                                                                                                                                                                                               |
| N-(pyrimidin-2-yl)sulfonic amide |  |         |           |  |          | 4-(methyleneamino)-N-(pyrimidin-2-yl)benzenesulfonamide | hydroxy  | methoxy |  | 20             |    | 20 |                                                                                                                         |                                                                                                                                                                                                                               |
| N-(pyrimidin-2-yl)sulfonic amide |  |         |           |  |          | (2,4-Dimethylphenyl)iminomethyl                         | hydroxy  | methoxy |  | 30             |    | 23 |                                                                                                                         |                                                                                                                                                                                                                               |
| N-(pyrimidin-2-yl)sulfonic amide |  |         |           |  |          | (2-hydroxyphenyl)iminomethyl                            | hydroxy  | methoxy |  | 22             |    | 25 |                                                                                                                         |                                                                                                                                                                                                                               |
|                                  |  | hydroxy | isopropyl |  |          |                                                         | chloride |         |  | 16             | 18 | 14 | 13                                                                                                                      | [14] The Gram-tested were <i>E. coli</i> ATCC 11229 (on the left) and <i>Enterobacter cloacae</i> ATCC13047 <i>D</i> (on the right). The Gram+ tested were <i>S. aureus</i> ATCC25923 (on the left) and <i>M. luteus</i> NRLL |
|                                  |  | hydroxy | isopropyl |  | chloride |                                                         | chloride |         |  | not determined | 19 | 17 | 24                                                                                                                      |                                                                                                                                                                                                                               |
|                                  |  | hydroxy | sec-butyl |  |          |                                                         | chloride |         |  | not determined | 12 | 13 | 12                                                                                                                      |                                                                                                                                                                                                                               |
|                                  |  | hydroxy | sec-butyl |  | chloride |                                                         | chloride |         |  | 14             | 20 | 12 | 20                                                                                                                      |                                                                                                                                                                                                                               |

|  |  |  |  |  |  |  |  |  |  |  |  |  |  |                       |
|--|--|--|--|--|--|--|--|--|--|--|--|--|--|-----------------------|
|  |  |  |  |  |  |  |  |  |  |  |  |  |  | B-4375 (on the right) |
|--|--|--|--|--|--|--|--|--|--|--|--|--|--|-----------------------|

## References

1. Piotto, S., et al., *Small azobenzene derivatives active against bacteria and fungi*. European journal of medicinal chemistry, 2013. **68**: p. 178-184.
2. Piotto, S., et al., *Synthesis and antimicrobial studies of new antibacterial azo-compounds active against staphylococcus aureus and listeria monocytogenes*. Molecules, 2017. **22**(8): p. 1372.
3. Concilio, S., et al., *Structure modification of an active azo-compound as a route to new antimicrobial compounds*. Molecules, 2017. **22**(6): p. 875.
4. Salta, J., et al., *Tuning the Effects of Bacterial Membrane Permeability through Photo-Isomerization of Antimicrobial Cationic Amphiphiles*. Chemistry–A European Journal, 2017. **23**(52): p. 12724-12728.
5. Velema, W.A., et al., *Optical control of antibacterial activity*. Nature chemistry, 2013. **5**(11): p. 924-928.
6. Kaur, H., et al., *Diazenyl schiff bases: synthesis, spectral analysis, antimicrobial studies and cytotoxic activity on human colorectal carcinoma cell line (HCT-116)*. Arabian Journal of Chemistry, 2020. **13**(1): p. 377-392.
7. Mkpenie, V.N., E.E. Essien, and I.V. Mkpenie, *Antimicrobial activity of azo-schiff bases derived from salicylaldehyde and para-substituted aniline*. World J. Pharm. Res., 2015. **4**(12): p. 52-60.
8. Nagasundaram, N., et al., *Synthesis, characterization and biological evaluation of novel azo fused 2, 3-dihydro-1H-perimidine derivatives: In vitro antibacterial, antibiofilm, anti-quorum sensing, DFT, in silico ADME and Molecular docking studies*. Journal of Molecular Structure, 2022. **1248**: p. 131437.
9. Keshavayya, J., *Synthesis, structural investigations and in vitro biological evaluation of N, N-dimethyl aniline derivatives based azo dyes as potential pharmacological agents*. Journal of Molecular Structure, 2019. **1186**: p. 404-412.
10. Ngaini, Z. and N.A. Mortadza, *Synthesis of halogenated azo-aspirin analogues from natural product derivatives as the potential antibacterial agents*. Natural product research, 2019. **33**(24): p. 3507-3514.
11. Ali, H.M., S.Q. Badr, and M.F.H. Al-Kinani. *DNA Binding three Azo Dyes as new Antibiotics*. in IOP Conference Series: Materials Science and Engineering. 2019. IOP Publishing.
12. Babamale, H.F., et al., *Synthesis and characterization of azobenzene derivatives and azobenzene-imidazolium conjugates with selective antimicrobial potential*. Journal of Molecular Structure, 2021. **1232**: p. 130049.
13. Jadou, B.K., A.J. Hameed, and A.Z. Al-Rubaie, *Synthesis, Antimicrobial, Antioxidant and Structural Studies of Some New Sulfa Drug Containing an Azo-azomethine Group*. Egyptian Journal of Chemistry, 2021. **64**(2): p. 751-759.
14. Bal, S., et al., *Synthesis, thermal stability, electronic features, and antimicrobial activity of phenolic azo dyes and their Ni (II) and Cu (II) complexes*. Chemical Papers, 2014. **68**(3): p. 352-361.
